1 Running head: LIKELIHOOD AND OUTLIERS IN PHYLOGENOMICS

2

3 Title: Analyzing contentious relationships and outlier genes in phylogenomics

4

5 Joseph F. Walker<sup>1</sup>, Joseph W. Brown<sup>1</sup>, and Stephen A. Smith<sup>1</sup>

6

7 <sup>1</sup>Department Ecology and Evolutionary Biology, University of Michigan, Ann Arbor,  
8 Michigan, 48109, USA

9

\*Corresponding authors

10

11 Corresponding author emails: [jfwalker@umich.edu](mailto:jfwalker@umich.edu), [eebsmith@umich.edu](mailto:eebsmith@umich.edu)

12

13

14

15

16

17

18

19

## ABSTRACT

20

21

22

23

24

25

26

27

28

29

30

31

32

33

34

35

36

37

38

39

Despite the wealth of evolutionary information available from genomic and transcriptomic data, recalcitrant relationships in phylogenomic studies remain throughout the tree of life. Recent studies have demonstrated that conflict is common among gene trees, and less than one percent of genes may ultimately drive species tree inference in supermatrix analyses. In this study, we examined plant and vertebrate datasets where supermatrix and coalescent-based species trees conflict. Using a two-topology site-specific log-likelihood test, we identified two highly influential genes in each dataset. While the outlier genes in the vertebrate dataset have been shown to be the result of errors in orthology detection, we demonstrate that the outlier genes from the plant dataset may be the result of biological processes rather than model or methodological errors. When the outlier genes were removed from each supermatrix, the inferred trees matched the topologies obtained from coalescent analyses. While most tests of this nature limit the comparison to a small number of fixed topologies, often two topologies, gene tree topologies generated under processes such as incomplete lineage sorting are unlikely to precisely match these topologies. We therefore examined edges across a set of trees and recover more support for the resolution favored by coalescent analyses. These results suggest that by expanding beyond fixed-topology comparisons, we can dramatically improve our understanding of the underlying signal in phylogenomic datasets by asking more targeted edge-based questions.

40

## INTRODUCTION

41 Recent studies have highlighted that small changes to a dataset can yield conflicting  
42 hypotheses at particular recalcitrant relationships with high support (i.e., 100% support  
43 from nonparametric bootstrap (BS) or posterior probability (PP) values). Prominent  
44 examples of this include many charismatic lineages such as the root of placental  
45 mammals (Morgan et al. 2013; Romiguier et al. 2013), early branching within Neoaves  
46 (Jarvis et al. 2014; Prum et al. 2015), and the earliest diverging lineage of extant  
47 angiosperms (Zanis et al. 2002; Wickett et al. 2014; Xi et al. 2014). The resolution of  
48 these relationships is critical to understanding the evolutionary history of their respective  
49 clades (e.g., patterns of biochemical, morphological, and life history evolution).

50 Finding the underlying causes of uncertainty in phylogenomic datasets is an  
51 essential step toward resolving problematic relationships. Recently, authors have  
52 developed means of exploring conflict between gene trees and species trees specifically  
53 for phylogenomic datasets (Salichos et al. 2014; Smith et al. 2015; Kobert et al. 2016),  
54 aiding in the identification of regions of species trees with considerable uncertainty  
55 despite strong statistical support from traditional support measures. Two studies have  
56 shown that the disproportionate influence of just one or two genes “outlier genes” on a  
57 supermatrix analysis is capable of altering tree topology inference (Brown and Thomson  
58 2017; Shen et al. 2017)(Brown and Thomson 2017; Shen et al. 2017)(Brown and  
59 Thomson 2017; Shen et al. 2017). Using a Bayes factor approach Brown and Thomson  
60 (2017) reanalyzed a series of published datasets and found that the transcriptome data  
61 from Chiari et al. (2012) contained outlier genes. When the outlier genes were included in  
62 phylogenetic reconstruction, a clade of turtles+crocodylians was inferred to be sister to

63 birds with 100% PP. The same topology was previously inferred using ML with  
64 nucleotide data in the original study by Chiari et al. (2012), but was dismissed in favor of  
65 a coalescent reconstruction that placed turtles sister to birds+crocodylians. When Brown  
66 and Thomson (2017) removed the outlier genes, the reduced supermatrix infers the same  
67 topology as the coalescent reconstruction with 100% PP. Another recently published  
68 study compared gene-wise likelihoods across multiple topologies to examine contentious  
69 relationships across the tree of life and found disproportionate influence of genes at all  
70 contentious relationships examined (Shen et al. 2017).

71         Given the prevalence of outlier genes in phylogenomic datasets, and the continued  
72 focus on contentious relationships in the tree of life, it is imperative that we develop  
73 methods for analyzing conflict and selecting among alternative resolutions for recalcitrant  
74 relationships. We build upon the discussions of Brown and Thomson (2017) and Shen et  
75 al. (2017) by addressing whether these outlier genes violate models of evolution.  
76 Furthermore, we present a method that expands on topology comparisons to instead  
77 pursue edge-based questions. Typically, site-wise and gene-wise log-likelihood analyses  
78 of phylogenomic datasets are performed in a pairwise manner on two or more fixed  
79 alternate topologies (e.g., Castoe et al. 2009; Smith et al. 2011; Shen et al. 2017).  
80 However, given widespread gene tree discordance (e.g., due to incomplete lineage  
81 sorting), it may be more realistic to assume that many alternative topologies are  
82 supported within larger genomic datasets (e.g., Smith et al. 2015; Pease et al. 2016;  
83 Walker et al. 2017). Additionally, when the research question involves a single  
84 relationship and not the entirety of the tree, it may be more appropriate to examine  
85 targeted edges instead of resolved topologies (Lee and Hugall 2003). This allows for any

86 processes that may be causing conflict in the non-focal parts of the tree to be  
87 accommodated without influencing the relationships of interest. Here, we compare results  
88 from two-topology gene-wise log-likelihood analyses and a novel approach of gene-wise  
89 edge (MGWE) analysis (see Methods below). We examine vertebrate (Chiari et al. 2012;  
90 Brown and Thomson 2017) and carnivorous Caryophyllales datasets (Walker et al. 2017)  
91 (the latter hereafter referred to as the carnivory dataset). Both datasets contain  
92 contentious relationships, outlier genes, and, in their respective original studies, the  
93 authors dismissed the supermatrix topology for the topology inferred using a coalescent  
94 method. In both cases we find that the use of an edge based approach results in stronger  
95 support for the topology hypothesized to be correct by researchers in the original study.

96

97

## METHODS

98

### *Data collection*

99 We obtained the 248 genes that were codon-aligned and analyzed by Brown and  
100 Thomson (2017) from the Dryad deposit (<http://dx.doi.org/10.5061/dryad.8gm85>) of the  
101 original study (Chiari et al. 2012) that focused on resolving the placement of turtles  
102 among amniotes. The coding DNA sequences of the 1237 one-to-one orthologs from  
103 Walker et al. (2017) to infer the relationships among carnivorous Caryophyllales  
104 (Eudicots: Superasterids) are available from Dryad  
105 (<http://datadryad.org/resource/doi:10.5061/dryad.vn730>). All programs used in this  
106 analysis may be found at <https://bitbucket.org/jfwalker/maximizelikelihoods> and the code  
107 to conduct the MGWE analysis may be found at  
108 <https://github.com/jfwalker/SiteSpecificLogLikelihood>.

109

110

### *Species trees*

111 Brown and Thomson (2017) used Bayesian analyses to obtain the topologies from the  
112 Chiari et al. (2012) data set. As our study focused on the use of maximum likelihood  
113 (ML) for detecting overly influential genes, we ensured that ML phylogenetic  
114 reconstruction would recapitulate the previous species tree results. To construct a  
115 supermatrix tree for the vertebrate dataset, the 248 individual vertebrate genes used in  
116 Brown and Thomson (2017) were concatenated using the Phyx program pxcats (Brown et  
117 al. 2017). The species tree was inferred in RAxML v8.2.1 (Stamatakis 2014) using the  
118 GTR+  $\Gamma$  model of evolution, and edge support was assessed from 200 rapid bootstrap  
119 replicates. Supermatrix trees for the vertebrate dataset were inferred both with all genes  
120 present, and again with the previously identified two outlier genes (8916 and 11434)  
121 removed (see below). The ML tree inferred from all the data from the carnivory dataset  
122 was downloaded from (<http://dx.doi.org/10.5061/dryad.33m48>) while a novel ML tree  
123 was inferred from a reduced supermatrix that excluded two highly informative genes  
124 (cluster575 and cluster3300; see below).

125

126

### *Gene tree construction and analysis of conflict*

127 Individual gene trees for both datasets were inferred using ML with the GTR+  $\Gamma$  model of  
128 evolution as implemented in RAxML. A SH-like test (Anisimova et al. 2011), as  
129 implemented in RAxML, was performed to assess gene tree edge support. As this test  
130 examines alternative topologies by nearest-neighbor interchange (NNI), it is possible that  
131 during the test a topology with a higher likelihood is found (i.e., an ‘NNI-optimal’

132 topology). When a better topology was found during the test performed for this study,  
133 that topology was used in downstream analyses. We used the pxrr program in the Phyx  
134 package (Brown et al. 2017) to root all gene trees on the outgroup (*Protopterus* for the  
135 vertebrate dataset, and *Beta vulgaris* and *Spinacia oleraceae* for the carnivory dataset)  
136 and we excluded gene trees where an outgroup was not present. We mapped conflict onto  
137 the supermatrix tree using phyparts (Smith et al. 2015) with SH-like support of < 80  
138 treated as uninformative. We chose 80 as a support cutoff due to the traditional cutoff of  
139 (95) being shown as overly conservative with this test (Guindon et al. 2010). Gene tree  
140 conflict was visualized using the script phypartspiecharts.py (available from  
141 <https://github.com/mossmatters/MJPythonNotebooks>). We conducted more detailed  
142 conflict analyses used for edge comparisons discussed below using pxbp as part of the  
143 Phyx package (Brown et al. 2017).

144

#### 145 *Calculating two-topology gene-wise log-likelihoods*

146 The alternate topologies (supermatrix and coalescent) and data matrices for the vertebrate  
147 and carnivory datasets were obtained from the original studies, Chiari et al. (2012) and  
148 Walker et al. (2017), respectively. We calculated site-wise log-likelihood scores for the  
149 two topologies in RAxML using the GTR+  $\Gamma$  model of evolution, with the data  
150 partitioned by gene. The differences in site-wise log-likelihoods between the candidate  
151 topologies were then calculated using scripts available from  
152 <https://bitbucket.org/jfwalker/maximizelikelihoods> and  
153 <https://github.com/jfwalker/SiteSpecificLogLikelihood>.

154

155 *Maximum gene-wise edge calculations*

156 In addition to pairwise topological comparisons, we also examined the maximum  
157 gene-wise edges (MGWE) (Fig 1.). For a single gene and a single focal edge, the MGWE  
158 is the likelihood of a gene tree with the highest likelihood that also displays the edge of  
159 interest. When calculating the MGWE for a focal edge across multiple genes, this  
160 approach does not require each gene to have the same topology, just that the likelihood  
161 comes from a tree that displays the edge of interest. This contrasts with a standard fixed  
162 topology comparison where the topology for each gene would be required to be the same  
163 (e.g., supermatrix vs. coalescent topology). Unlike the fixed topology approach the  
164 MGWE allows for genes to have conflicting relationships outside of the edge of interest.  
165 Here, we are interested in comparing the MGWE for sets of alternative and conflicting  
166 edges in order to determine if, by relaxing the requirement for each gene to share the  
167 topology, we gain insight into the signal for conflicting relationships. One could calculate  
168 the MGWE on any number of edges, and we consider the dominant alternative edges as  
169 identified in the literature.

170 While there are several ways that MGWEs could be calculated, we restricted the  
171 tree space under consideration by circumscribing a set of empirically-supported  
172 topologies (TREESET) consisting of the supermatrix-inferred topology, coalescent  
173 inferred topology, and individual gene trees that contained all taxa. We then identified the  
174 conflicting trees and pooled trees based upon shared conflicting relationships for the  
175 edges of interest (EDGE). We then calculated the maximum likelihood for each gene and  
176 for each topology.



177 For the edges of interest, we calculated the MGWEs by retaining the likelihood  
178 for the tree with the highest likelihood that displayed the focal EDGE. This became the  
179 representative likelihood for that EDGE. We then summed the representative likelihoods  
180 together. That value, however, is not comparable between edges because a different  
181 number of trees may be compared (Theobald 2010). Therefore, we calculated AIC scores  
182  $(-2\ln(L) + 2k)$  for each EDGE. This, effectively, allowed for comparisons between more  
183 parameter rich models and parameter poor models. The parameters,  $k$ , were calculated  
184 based on the number of taxa,  $n$ , and the number of genes in the analysis,  $g$ . The branch  
185 length parameters equal  $2 \times n - 3$  and the GTR +  $\Gamma$  model of evolution = 6 (where base  
186 frequencies were empirical and not estimated). The supermatrix ML analyses that  
187 assumed a single set of branch lengths on one topology and model parameters to be  
188 unlinked across genes consisted of  $2 \times n - 3 + 6 \times g$  parameters. For each EDGE, because  
189 branch lengths were calculated for each gene tree, the parameters consisted of the sum of  
190 the number of parameters used for each gene:  $g \times (2 \times n - 3 + 6)$ . In addition to  
191 calculating AICs for the coalescent and supermatrix topologies with a single set of branch  
192 lengths across the gene set, we also calculated AICs allowing the branch lengths to vary  
193 across genes. This calculation results in the same number of parameters as the EDGE  
194 calculations. Here, we are focused on addressing conflicting signal between edges of  
195 interest and so the increase in the number of parameters is acceptable considering our  
196 examination of gene trees. However, future work could attempt to limit the expansion of  
197 the number of parameters for each EDGE by sharing branch length estimates or model  
198 parameters across genes.

199

200 *Testing for paralogy in carnivory dataset*

201 The homolog trees created from amino acid data in the study by Walker et al. (2017)  
202 were downloaded from Dryad (<http://datadryad.org/resource/doi:10.5061/dryad.vn730>).  
203 We matched the sequences from the outlier genes to their corresponding sequence in the  
204 amino acid homolog trees. This allowed us to examine whether a nucleotide cluster  
205 contained homology errors that may be exposed by the slower evolving amino acid  
206 dataset.

207

208 RESULTS

209 *Gene tree conflict and log-likelihood analysis reveals genes of disproportionate influence*

210 Our ML analysis of the vertebrate dataset recovered the same supermatrix topology (Fig.  
211 2) as found with ML by Chiari et al. (2012) and Bayesian inference by Brown and  
212 Thomson (2017). The difference in log-likelihood between the supermatrix and  
213 coalescent topologies for the vertebrate dataset was 4.01. Ninety-three of 248 gene trees  
214 could be rooted on the outgroup *Protopterus* and only five of these had all taxa  
215 represented (Supplementary Table 1). We found low support for relationships within  
216 gene trees (SH <80) and significant gene tree conflict (Fig. 2). Of the gene trees with high  
217 support (SH >80), seven resolved turtles+crocodilians as sister to birds (hereafter referred  
218 to as the vertebrate supermatrix topology) and nine resolved crocodilians+birds sister to  
219 turtles (hereafter referred to as the vertebrate coalescent topology).

220 The two-topology gene-wise log-likelihood comparison showed that 105 genes  
221 had a higher likelihood score for the vertebrate supermatrix topology while 143 supported  
222 the vertebrate coalescent topology (Figs. 3A, 4A). Two genes (ENSGALG00000008916

223 and ENSGALG00000011434, referred to here as 8916 and 11434, respectively),  
224 appeared as outliers, exhibiting a disproportionate influence on the overall likelihood of  
225 the supermatrix (Fig. 3A). The outlier genes identified with maximum likelihood  
226 analyses matched those previously identified as outliers using Bayes factors (Brown and  
227 Thomson 2017). These two genes both supported the vertebrate supermatrix topology  
228 with log-likelihood scores of 79.55 and 46.01 greater than the alternative coalescent tree  
229 topology, respectively. The difference in log-likelihood between the two topologies of the  
230 non-outlier genes ranged from  $|0.006|$  to  $|19.891|$  with an average of 3.31 for all genes in  
231 the analysis. The removal of the vertebrate genes 8916 and 11434, as shown by Brown  
232 and Thomson (2017), recovered the coalescent topology, albeit with low bootstrap  
233 support (BS = 12; Supplementary Fig. 1).

234 Previous work on the carnivory dataset demonstrated that the placement of the  
235 *Ancistrocladus+Drosophyllum* clade (Fig. 2) contained significant conflict and is  
236 strongly influenced by species sampling (Walker et al. 2017). The log-likelihood  
237 difference between the supermatrix and coalescent topologies was 74.94 in favor of the  
238 former. The two-topology log-likelihood comparison between the dominant topologies on  
239 the carnivory dataset (Fig. 3B) showed that 623 genes supported  
240 *Ancistrocladus+Drosophyllum* sister to all other carnivorous plants (hereafter referred to  
241 as carnivory supermatrix topology) while 614 genes supported  
242 *Ancistrocladus+Drosophyllum* sister to *Nepenthes alata+Nepenthes ampullaria*  
243 (hereafter referred to as carnivory coalescent topology; Figs. 3A & 4D). Two genes  
244 (cluster575 and cluster3300) contributed disproportionately to the overall likelihood.  
245 Individually these two genes have a difference in log-likelihood scores between the two

246 topologies of 33.06 and 16.63, respectively, and support the carnivory supermatrix  
247 topology. When we reanalyzed the supermatrix with cluster575 and cluster3300 removed,  
248 the carnivory coalescent topology was recovered, with 100% BS support (Supplementary  
249 Fig. 1). The difference between the two topologies in log-likelihood of the non-outlier  
250 genes ranged from  $|0.001|$  to  $|12.82|$  with an average of 2.82 for all genes in the analysis.

251

### 252 *Edge based analysis changes supported topology*

253 We compared MGWE and two topology gene-wise likelihoods involving the contentious  
254 bird, crocodylian, and turtle relationships in the vertebrate dataset (Fig. 4B). We found  
255 seven unique topologies with the necessary species coverage to conduct the analyses: five  
256 gene tree topologies from Chiari et al. (2012) and the two dominant species tree  
257 topologies. The set of seven trees included three major conflicting edges for the  
258 relationship in question: the two resolutions found in the supermatrix and coalescent trees,  
259 and birds sister to crocodylian+mammals+turtles. 91 genes supported the vertebrate  
260 supermatrix edge, 144 genes supported the vertebrate coalescent edge, and 13 genes  
261 supported the third conflicting edge (Fig. 4B). When comparing the supermatrix analysis  
262 with a single set of branch lengths, to that where it was treated as a sum of gene tree  
263 likelihoods, we found a superior AIC score for the sum of gene tree likelihoods (Table 1).  
264 The MGWE AIC scores for the summed likelihoods of the supermatrix (three source  
265 trees), the coalescent (three source trees), and the third conflicting edge (one source tree)  
266 were highest for the coalescent edge and out of all tested models the coalescent edge was  
267 inferred to be the best (Table 1).

268 For the carnivory dataset, we found 168 unique tree topologies to include in the  
269 tree set. The 168 tree topologies contained 41 conflicting edges for the relationship in  
270 question with 3 dominant edges. The MGWE analyses found 499 genes supported the  
271 supermatrix edge, 466 genes supported the coalescent edge, and 272 genes supported 15  
272 additional edges (Figs. 2D, 3E). When we further compared the MGWE AIC scores for  
273 the supermatrix (44 source trees), the coalescent (56 source trees), and for the third edge  
274 (24 source trees) we found the coalescent edge to have the best AIC score out of all tested  
275 models (Table 1).

276

### 277 *Outlier gene examination*

278 For the carnivory dataset, we explored the possibility that the strongly conflicting genes  
279 cluster575 and cluster3300 reflected methodological error in the assembly pipeline, as is  
280 the case for the genes identified by Brown and Thomson (2017) for the vertebrate dataset.  
281 However, both the alignment and inferred phylogram for each gene revealed no obvious  
282 problems or potential sources of systematic error (sparse alignment, abnormally long  
283 branch lengths, etc.). We also explored whether compositional heterogeneity could  
284 explain the strongly conflicting results (i.e., that the relationships were not truly  
285 conflicting, but instead incorrectly modeled). However, both RY-coding in RAxML and  
286 explicit modeling of multiple equilibrium frequencies (2, 3, or 4 composition regimes)  
287 across the tree in p4 v1.0 (Foster 2004) failed to overturn the inferred relationships. We  
288 further explored the possibility of misidentified orthology. By examining the homolog  
289 tree produced from amino acid data, we identified the ortholog from the nucleotide data  
290 to be complete (i.e., an ortholog within the homolog amino acid tree). We found that with

291 the slower amino acid data the sequences in the nucleotide cluster575 were inferred as a  
292 single monophyletic ortholog within a duplicated homolog (Supplementary Fig. 2). The  
293 discrepancies that appeared between the amino acid dataset and the CDS dataset were  
294 found to be either different in-paralogs/splice sites maintained during the dataset cleaning  
295 procedure or short sequences that were not identified as homologs in the coding DNA  
296 sequence (CDS) dataset (Supplementary Table 2 and Supplementary Fig. 2).

297

## 298 DISCUSSION

299 Biological processes including substitution saturation, hybridization, horizontal gene  
300 transfer, and incomplete lineage sorting can contribute to conflicting signal and may  
301 explain both conflict and lack of support widely found in phylogenomic datasets  
302 (Salichos et al. 2014; Smith et al. 2015; Kobert et al. 2016). In addition to these  
303 biological processes, other data set assembly issues such as limited taxonomic coverage  
304 for each gene may also contribute to conflict and low support in these data sets. For  
305 example, while the carnivory dataset had extensive data overlap, the vertebrate dataset  
306 only had five gene regions that contained sequence data for every species (Supplementary  
307 Table 1). To further complicate the challenges facing phylogenomic analyses, high  
308 support values, especially from concatenated runs, can mask significant underlying  
309 conflict (Lee and Hugall, 2003; Ryan et al. 2013; Salichos et al. 2014; Smith et al. 2015;  
310 Kobert et al. 2016; Pease et al. 2017). Both datasets examined here recovered high  
311 support for two different topologies depending on the inclusion or exclusion of two genes  
312 with disproportionate influence on the likelihood (Brown and Thomson 2017; Walker et

313 al. 2017). In the case of the carnivory dataset, the inferred topology changes with the  
314 inclusion or exclusion of just 0.0016% of the genes.

315 To address these challenges, several approaches have been outlined in the  
316 literature. Recently, the discovery of outlier genes has resulted in the necessity to closely  
317 examine gene tree topologies and likelihoods (Brown and Thomson 2017; Shen et al.  
318 2017). Outlier genes may be the result of biological processes or methodological errors,  
319 and due to their high influence of species tree inference should be thoroughly examined.  
320 Previously, the outlier genes in a vertebrate dataset were found to be the result of errors  
321 in orthology detection and not biological processes (Brown and Thomson 2017). We  
322 explored, in this study, the potential sources of error for the outlier genes in a dataset of  
323 carnivorous plants. While the genomic resources are not available to fully examine the  
324 carnivorous outlier genes (e.g., we do not yet have synteny or information on gene loss),  
325 our analyses did not detect any obvious problems with alignment, compositional  
326 heterogeneity, or homology. We found one gene, cluster575, to be an ortholog of a gene  
327 that experienced a duplication event prior to the divergence of both ingroup and outgroup  
328 taxa (Supplementary Fig. 3). While we cannot rule out every possible source of error, we  
329 also cannot identify a source of methodological error, suggesting the possibility that the  
330 conflicting topology is the result of real (albeit unknown) biological processes.

331 Fixed topological and pairwise examinations explored by most authors (Castoe et  
332 al. 2009; Smith et al. 2011; Shen et al. 2017), have been very informative for the  
333 identification of not only outlier genes, but also for phylogenetic signal for and against  
334 conflicting phylogenetic relationships. However, for many reasons, these fixed  
335 topological examinations, where a single topology is assumed to underlie all genes, may

336 not be optimal. Conflict among gene trees is common and expected from processes such  
337 as incomplete lineage sorting, hybridization, and other processes. For instance, Jarvis et  
338 al. (2014) reported that no gene trees from a genomic data set of 48 species of birds  
339 matched the inferred species tree. Furthermore, such a result becomes increasingly likely  
340 as sampling breadth (both taxa within a clade as well as the age of the clade itself)  
341 increases. The results of a fixed-topology analysis may be driven by the resolution of a  
342 part of the phylogeny other than the area of interest, as fixed-topology analyses condition  
343 on fully bifurcating trees that necessarily resolve conflict in the entire tree.

344 To overcome these limitations, instead of fixed singular topologies, we examined  
345 edges across a set of empirically supported candidate topologies, as defined by the set of  
346 inferred gene trees and the two tree hypotheses in question. By examining edges, we  
347 accommodate for uncertainty across the rest of the tree, regardless of the process  
348 generating that uncertainty. We examined this with both a vertebrate dataset and  
349 carnivorous plants dataset discussed above. The vertebrate dataset contained three  
350 alternative edges for the relationship of interest while the carnivory dataset contained 41  
351 different edges representing 168 topologies. The MGWE analysis and AIC scores of both  
352 the vertebrate dataset and the carnivory dataset both suggested a better fit of the  
353 coalescent edge than the supermatrix edge (Table 1). Also, in both cases, we found that  
354 the AIC score supported the higher parameterized model, as opposed to a single fixed  
355 topology and branch lengths. While we do not suggest that this is the best fit model and  
356 only the best of the ones analyzed here, this indicates that future studies may benefit from  
357 allowing more heterogeneity than is typically involved in a concatenation analysis. This  
358 will require careful examination of some of the complexity involved in these large



359 phylogenomic analyses. For example, there is the issue of how missing data is handled in  
360 these calculations (e.g., Stamatakis and Alachiotis 2010). Furthermore, the models  
361 explored could potentially have significantly reduced parameters by sharing topologies  
362 and branch lengths across some gene regions, including potentially scaling branch lengths  
363 proportionally (e.g., as is possible with the -spp option in the program iqtree).  
364 Nevertheless, the exploratory analyses presented here provide additional evidence that a  
365 simple concatenation approach with these large datasets masks important heterogeneity  
366 that can be analyzed further to help inform phylogenetic resolution.

367         The results presented here contribute to a growing body of literature that address  
368 the question of how phylogenomic analyses should proceed in the presence of highly  
369 influential outlier genes, conflicting topologies, and ever expanding datasets (Wickett et  
370 al. 2014; Pease et al. 2016; Brown and Thomson 2017; Shen et al. 2017; Yang et al.  
371 2017). For example, some authors have noted, and it is the case here, that supermatrix  
372 analyses may be more susceptible to the problem of strong outliers (Shen et al. 2017;  
373 Walker et al. 2017). In these studies, the resolutions inferred using a coalescent method  
374 were generally favored. When the dominant process generating gene tree conflict is  
375 incomplete lineage sorting, coalescent methods should perform better (i.e., when gene  
376 tree diversity is modeled correctly). Some coalescent methods that weigh all gene tree  
377 equally (e.g., Mirarab and Warnow 2015), may overcome the problem of outlier genes  
378 even if incomplete lineage sorting is not the dominant source of conflict simply by  
379 eliminating the disproportionate influence of one or two outlying genes. Here, we  
380 demonstrate with two empirical examples that the coalescent resolution had higher  
381 support when examining edges without using an explicit coalescent method.



405 We would like to thank Alexis Stamatakis for advice on RAxML and Nathanael Walker-  
406 Hale, Javier Igea, Oscar Vargas, Greg Stull, and Ning Wang for discussion of the  
407 manuscript and methods.

408

409

#### REFERENCES

410

411 Anisimova M., Gil M., Dufayard J.F., Dessimoz C., Gascuel O. 2011. Survey of branch  
412 support methods demonstrates accuracy, power, and robustness of fast likelihood-  
413 based approximation schemes. *Syst. Biol.* 60:685–699.

414 Brown J.M., Thomson R.C. 2017. Bayes Factors Unmask Highly Variable Information  
415 Content , Bias , and Extreme Influence in Phylogenomic Analyses. *Syst. Biol.*  
416 66:517–530.

417 Brown J.W., Walker J.F., Smith S.A. 2017. Phyx: phylogenetic tools for unix.  
418 *Bioinformatics.* 33:1886–1888.

419 Castoe T.A., de Koning A.P.J., Kim H.-M., Gu W., Noonan B.P., Naylor G., Jiang Z.J.,  
420 Parkinson C.L., Pollock D.D. 2009. Evidence for an ancient adaptive episode of  
421 convergent molecular evolution. *Proc. Natl. Acad. Sci.* 106:8986–8991.

422 Chiari Y., Cahais V., Galtier N., Delsuc F. 2012. Phylogenomic analyses support the  
423 position of turtles as the sister group of birds and crocodiles ( Archosauria ). *BMC*  
424 *Biol.* 10:65.

425 Foster P.G. 2004. Modeling compositional heterogeneity. *Syst Biol.* 53:485–495.

426 Guindon S., Dufayard J.F., Lefort V., Anisimova M., Hordijk W., Gascuel O. 2010. New  
427 algorithms and methods to estimate maximum-likelihood phylogenies: Assessing the

428 performance of PhyML 3.0. *Syst. Biol.* 59:307–321.

429 Jarvis E.D., Mirarab S., Aberer A.J., Li B., Houde P., Li C., Ho S.Y.W., Faircloth B.C.,  
430 Nabholz B., Howard J.T., Suh A., Weber C.C., da Fonseca R.R., Li J., Zhang F., Li  
431 H., Zhou L., Narula N., Liu L., Ganapathy G., Boussau B., Bayzid M.S.,  
432 Zavidovych V., Subramanian S., Gabaldon T., Capella-Gutierrez S., Huerta-Cepas J.,  
433 Rekepalli B., Munch K., Schierup M., Lindow B., Warren W.C., Ray D., Green R.E.,  
434 Bruford M.W., Zhan X., Dixon A., Li S., Li N., Huang Y., Derryberry E.P.,  
435 Bertelsen M.F., Sheldon F.H., Brumfield R.T., Mello C. V., Lovell P. V., Wirthlin  
436 M., Schneider M.P.C., Prosdocimi F., Samaniego J.A., Velazquez A.M. V., Alfaro-  
437 Nunez A., Campos P.F., Petersen B., Sicheritz-Ponten T., Pas A., Bailey T., Scofield  
438 P., Bunce M., Lambert D.M., Zhou Q., Perelman P., Driskell A.C., Shapiro B.,  
439 Xiong Z., Zeng Y., Liu S., Li Z., Liu B., Wu K., Xiao J., Yinqi X., Zheng Q., Zhang  
440 Y., Yang H., Wang J., Smeds L., Rheindt F.E., Braun M., Fjeldsa J., Orlando L.,  
441 Barker F.K., Jonsson K.A., Johnson W., Koepfli K.-P., O’Brien S., Haussler D.,  
442 Ryder O.A., Rahbek C., Willerslev E., Graves G.R., Glenn T.C., McCormack J.,  
443 Burt D., Ellegren H., Alstrom P., Edwards S. V., Stamatakis A., Mindell D.P.,  
444 Cracraft J., Braun E.L., Warnow T., Jun W., Gilbert M.T.P., Zhang G. 2014. Whole-  
445 genome analyses resolve early branches in the tree of life of modern birds. *Science*  
446 (80-. ). 346:1320–1331.

447 Kobert K., Salichos L., Rokas A., Stamatakis A. 2016. Computing the internode certainty  
448 and related measures from partial gene trees. *Mol. Biol. Evol.* Advance Ac:1–17.

449 Lee M.S.Y., Hugall A.F. 2003. Partitioned Likelihood Support and the Evaluation of  
450 Data Set Conflict. *Syst. Biol.* 52:15–22.

- 451 Mirarab S., Warnow T. 2015. ASTRAL-II: Coalescent-based species tree estimation with  
452 many hundreds of taxa and thousands of genes. *Bioinformatics*. 31:i44–i52.
- 453 Morgan C.C., Foster P.G., Webb A.E., Pisani D., McInerney J.O., O’Connell M.J. 2013.  
454 Heterogeneous models place the root of the placental mammal phylogeny. *Mol. Biol.*  
455 *Evol.* 30:2145–56.
- 456 Pease J.B., Brown J.W., Walker J.F., Hinchliff C.E., Smith S.A. 2017. Quartet Sampling  
457 distinguishes lack of support from conflicting support in the plant tree of life.  
458 *BioRxiv*.
- 459 Pease J.B., Haak D.C., Hahn M.W., Moyle L.C. 2016. Phylogenomics Reveals Three  
460 Sources of Adaptive Variation during a Rapid Radiation. *PLoS Biol.* 14:1–24.
- 461 Prum R.O., Berv J.S., Dornburg A., Field D.J., Townsend J.P., Moriarty Lemmon E.,  
462 Lemmon A.R. 2015. A comprehensive phylogeny of birds (Aves) using targeted  
463 next-generation DNA sequencing. *Nature*. 526:569–573.
- 464 Romiguier J., Ranwez V., Delsuc F., Galtier N., Douzery E.J.P. 2013. Less is more in  
465 mammalian phylogenomics: AT-rich genes minimize tree conflicts and unravel the  
466 root of placental mammals. *Mol. Biol. Evol.* 30:2134–44.
- 467 Ryan J.F., Pang K., Schnitzler C.E., Nguyen A.D., Moreland R.T., Simmons D.K., Koch  
468 B.J., Francis W.R., Havlak P., Smith S.A., Putnam N.H., Haddock S.H., Dunn C.W.,  
469 Wolfsberg T.G., Mullikin J.C., Martindale M.Q., Baxevanis A.D. 2013. The genome  
470 of the ctenophore *Mnemiopsis leidyi* and its implications for cell type evolution.  
471 *Science* (80-. ). 342:1242592.
- 472 Salichos L., Stamatakis A., Rokas A. 2014. Novel information theory-based measures for  
473 quantifying incongruence among phylogenetic trees. *Mol. Biol. Evol.* 31:1261–1271.

- 474 Shen X., Hittinger C.T., Rokas A. 2017. Contentious relationships in phylogenomic  
475 studies can be driven by a handful of genes. *Nat. Ecol. Evol.* 1:1–10.
- 476 Smith S.A., Moore M.J., Brown J.W., Yang Y. 2015. Analysis of phylogenomic datasets  
477 reveals conflict, concordance, and gene duplications with examples from animals  
478 and plants. *BMC Evol. Biol.* 15:150.
- 479 Smith S.A., Wilson N.G., Goetz F.E., Feehery C., Andrade S.C.S., Rouse G.W., Giribet  
480 G., Dunn C.W. 2011. Resolving the evolutionary relationships of molluscs with  
481 phylogenomic tools. *Nature.* 480:364–367.
- 482 Stamatakis A. 2014. RAxML version 8: A tool for phylogenetic analysis and post-  
483 analysis of large phylogenies. *Bioinformatics.* 30:1312–1313.
- 484 Stamatakis A., Alachiotis N. 2010. Time and memory efficient likelihood-based tree  
485 searches on phylogenomic alignments with missing data. *Bioinformatics.* 26:132–  
486 139.
- 487 Theobald D.L. 2010. A formal test of the theory of universal common ancestry. *Nature.*  
488 465:219–222.
- 489 Walker J.F., Yang Y., Moore M.J., Mikenas J., Timoneda A., Brockington S.F., Smith  
490 S.A. 2017. Widespread paleopolyploidy , gene tree conflict , and recalcitrant  
491 relationships among the. *Am. J. Bot.* 104:858–867.
- 492 Wickett N.J., Mirarab S., Nguyen N., Warnow T., Carpenter E., Matasci N.,  
493 Ayyampalayam S., Barker M.S., Burleigh J.G., Gitzendanner M.A., Ruhfel B.R.,  
494 Wafula E., Der J.P., Graham S.W., Mathews S., Melkonian M., Soltis D.E., Soltis  
495 P.S., Miles N.W., Rothfels C.J., Pokorny L., Shaw A.J., DeGironimo L., Stevenson  
496 D.W., Surek B., Villarreal J.C., Roure B., Philippe H., DePamphilis C.W., Chen T.,

497 Deyholos M.K., Baucom R.S., Kutchan T.M., Augustin M.M., Wang J., Zhang Y.,  
498 Tian Z., Yan Z., Wu X., Sun X., Wong G.K.-S., Leebens-Mack J. 2014.  
499 Phylotranscriptomic analysis of the origin and early diversification of land plants.  
500 Proc. Natl. Acad. Sci. 111:E4859–E4868.

501 Xi Z., Liu L., Rest J.S., Davis C.C. 2014. Coalescent versus Concatenation Methods and  
502 the Placement of Amborella as Sister to Water Lilies. Syst. Biol. 63:919–932.

503 Yang Y., Moore M.J., Brockington S.F., Mikenas J., Olivieri J., Walker J.F., Smith S.A.  
504 2017. Improved transcriptome sampling pinpoints 26 paleopolyploidy events in  
505 Caryophyllales, including two paleo-allopolyploidy events. bioRxiv.

506 Zanis M.J., Soltis D.E., Soltis P.S., Mathews S., Donoghue M.J. 2002. The root of the  
507 angiosperms revisited. Proc. Natl. Acad. Sci. U. S. A. 99:6848–53.

508

509

510

### Tree set

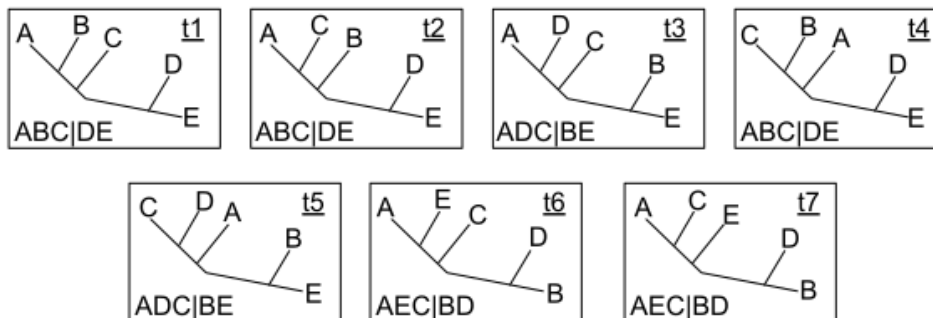

### MGWE

| Edge     | Gene 1      | Gene 2      | Gene 3      | Gene 4      | Gene 5      |
|----------|-------------|-------------|-------------|-------------|-------------|
| ABC   DE | -20.00 (t1) | -10.00 (t4) | -11.00 (t2) | -14.00 (t1) | -9.00 (t1)  |
| ADC   BE | -90.00 (t3) | -5.00 (t5)  | -4.00 (t5)  | -50.00 (t3) | -20.00 (t5) |
| AEC   BD | -15.00 (t6) | -11.00 (t7) | -7.00 (t6)  | -8.00 (t7)  | -10.00 (t6) |

511

512

513

514 **Figure 1. Outline for the MGWE procedure.** The inferred tree set is depicted at the top,

515 with the tree number in the top right hand corner of each box, and the edge representing

516 the relationship of interest in the bottom left hand corner. The MGWE shows the best

517 likelihood for each edge at each gene, with the tree from which that likelihood was

518 obtained in the box in parentheses next to the likelihood score.

519

520

521

522

523



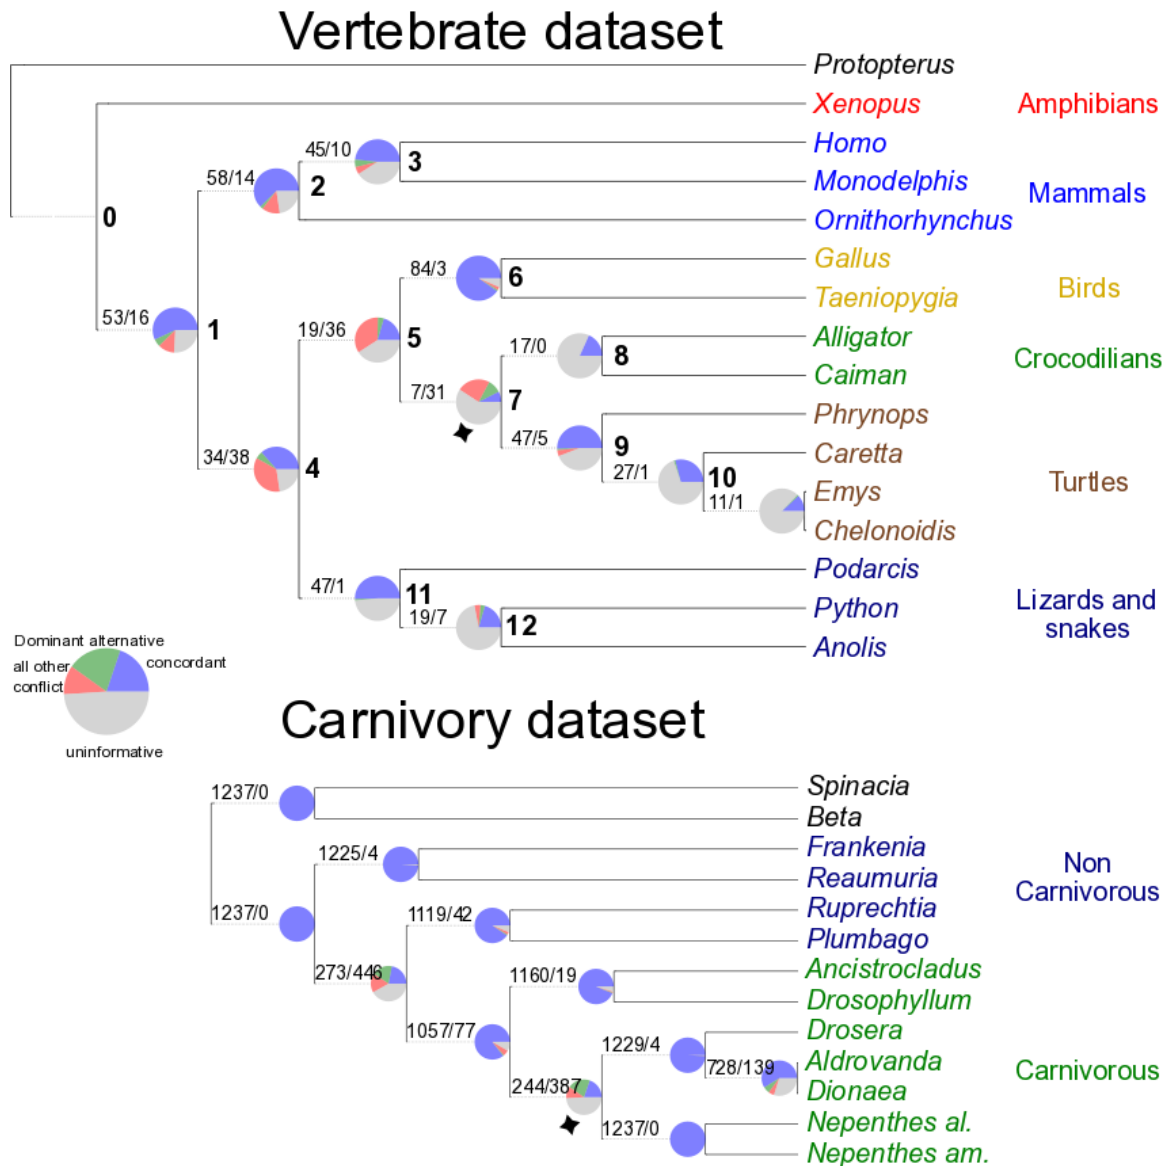

524

525 **Figure 2. Maximum likelihood trees inferred by RAxML for the Chiari et al. 2012**  
 526 **(vertebrate) and Walker et al. 2017 (carnivorous Caryophyllales) datasets.** Conflict  
 527 analysis for the vertebrate (A) and carnivory (B) datasets. The vertebrate analysis  
 528 includes the 93 genes that contained the outgroup (*Protopterus*), and the carnivory  
 529 analysis includes 1237 genes all of which had the outgroups (*Spinacia oleraceae* and  
 530 *Beta vulgaris*). Blue represents gene trees that are concordant with the relationship, grey  
 531 represents uninformative genes (SH-like < 80 or no taxon representation for the edge),

532 green represents the dominant alternate topology, and red represents all other conflict.

533 Numbers on edges represent concordance/conflict. Bold numbers at the nodes of the

534 vertebrate dataset correspond to edge numbers in Supplementary Table 1.

535

536

537

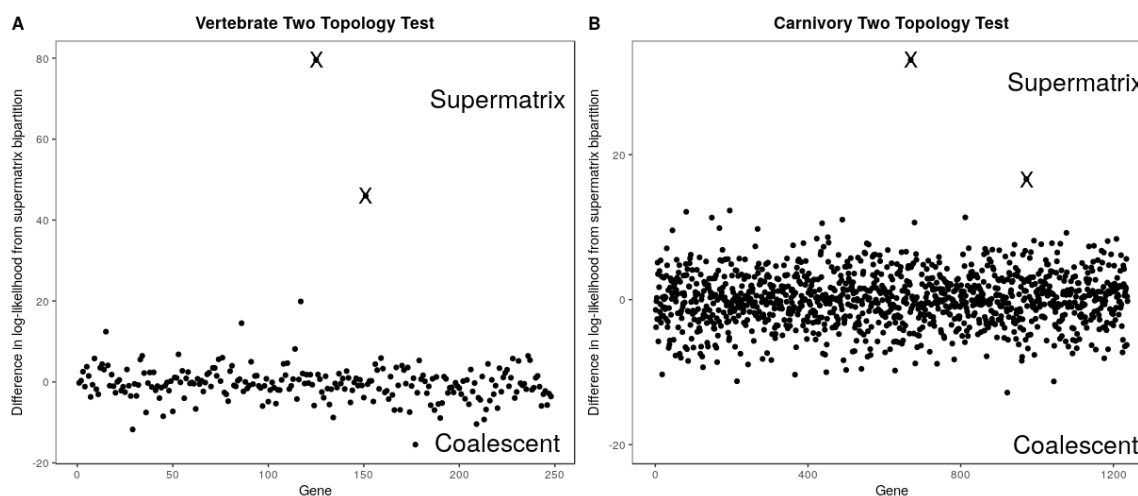

538

539

540

541

542 **Figure 3. Identification of outlier genes using gene-wise likelihood test.** A&B) Show

543 the results of the two-topology test on the vertebrate and carnivory dataset, respectively,

544 using the coalescent (negative values) and supermatrix (positive values) topologies as the

545 comparison. The genes identified as outliers from the analysis are marked with an X.

546

547

548

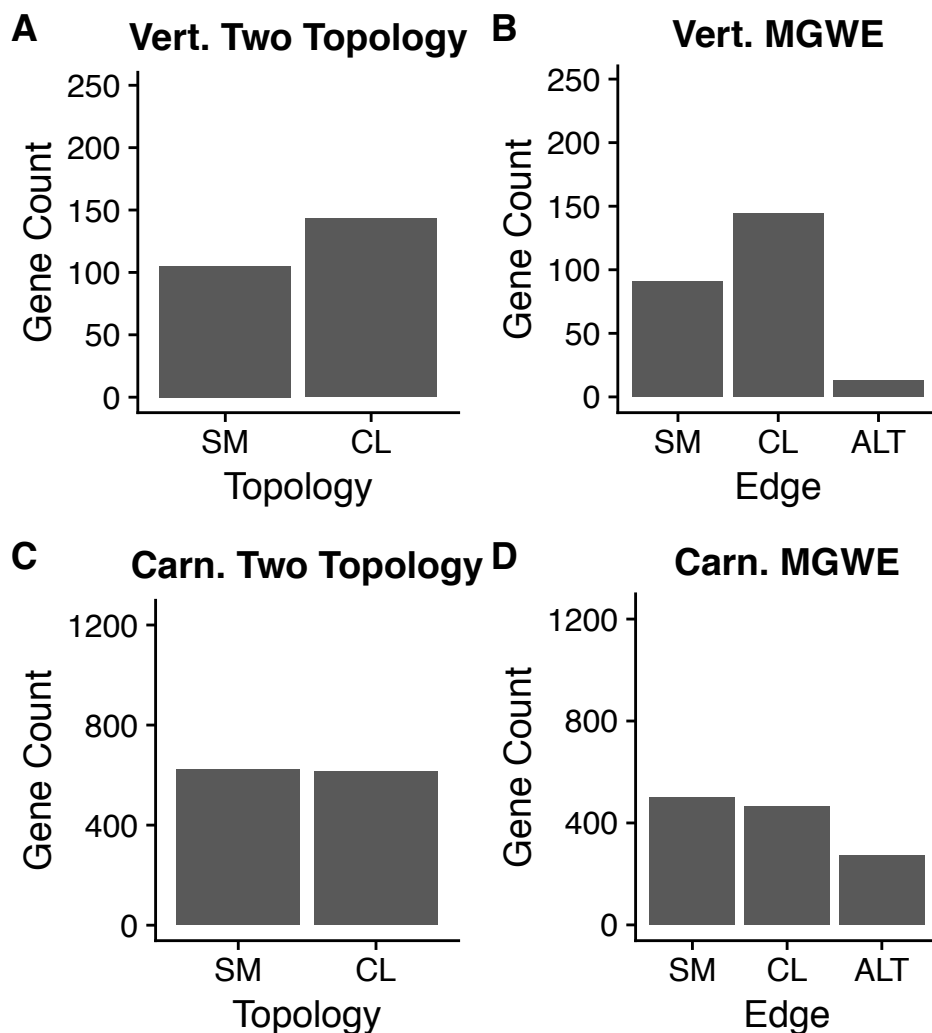

549

550

551

552 **Figure 4. Bar plot representing gene counts for the two-topology and MGWE**

553 **methods.** A&C) represent counts of genes that support the supermatrix inferred

554 maximum likelihood (ML) topology and the maximum quartet support species tree

555 (MQSST), for the vertebrate and carnivore datasets respectively. B&D) Show the results

556 of the MGWB analysis for support of the edge found in the ML analysis, the conflicting

557 edge from the MQSST analysis, and the sum of all genes supporting an alternative

558 conflict from an edge in the TREE SET.

559

560

561

562 **Table 1. Results of model testing the various topologies and edges.**

563

|                      |                      |               |                       |                |                      |               |          |
|----------------------|----------------------|---------------|-----------------------|----------------|----------------------|---------------|----------|
| <b>Vertebrate</b>    | Supermatrix          | Topology      | -1,047,406.05         | 1517           | 2,097,846.11         | 22374.01      |          |
|                      |                      | As Gene Trees | -1,031,489.81         | 6442           | 2,075,863.63         | 391.53        |          |
|                      |                      | Edge          | -1,031,423.65         | 6442           | 2,075,731.31         | 259.20        |          |
|                      | Coalescent           | Topology      | -1,047,410.07         | 1517           | 2,097,854.15         | 22382.04      |          |
|                      |                      | As Gene Trees | -1,031,450.71         | 6442           | 2,075,785.43         | 313.32        |          |
|                      |                      | <b>Edge</b>   | <b>-1,031,294.05</b>  | <b>6442</b>    | <b>2,075,472.10</b>  | <b>0</b>      |          |
|                      | Dominant Alternative | Edge          | -1,033,773.81         | 6442           | 2,080,431.62         | 4959.52       |          |
|                      | <b>Carnivory</b>     | Supermatrix   | Topology              | -13,305,055.20 | 7445                 | 26,625,000.40 | 36618.41 |
|                      |                      |               | As Gene Trees         | -13,205,130.14 | 35873                | 26,595,640.58 | 7258.59  |
| Edge                 |                      |               | -13,258,387.61        | 35873          | 26,588,521.23        | 139.24        |          |
| Coalescent           |                      | Topology      | -13,305,130.14        | 7445           | 26,625,150.28        | 36768.28      |          |
|                      |                      | As Gene Trees | -13,262,019.55        | 35873          | 26,595,785.10        | 7403.10       |          |
|                      |                      | <b>Edge</b>   | <b>-13,258,317.99</b> | <b>35873</b>   | <b>26,588,381.99</b> | <b>0</b>      |          |
| Dominant Alternative |                      | Edge          | -13,260,106.83        | 35873          | 26,591,959.66        | 3577.67       |          |

564

565

566

567

568

\*In the type column, "Topology" represents the supermatrix or coalescent topology with a single set of branch lengths, "As Gene Trees" is the supermatrix or coalescent topology with branch lengths varying among genes, and "Edge" is the MGWE analysis. The top AIC score is bolded.

569

APPENDICES

570

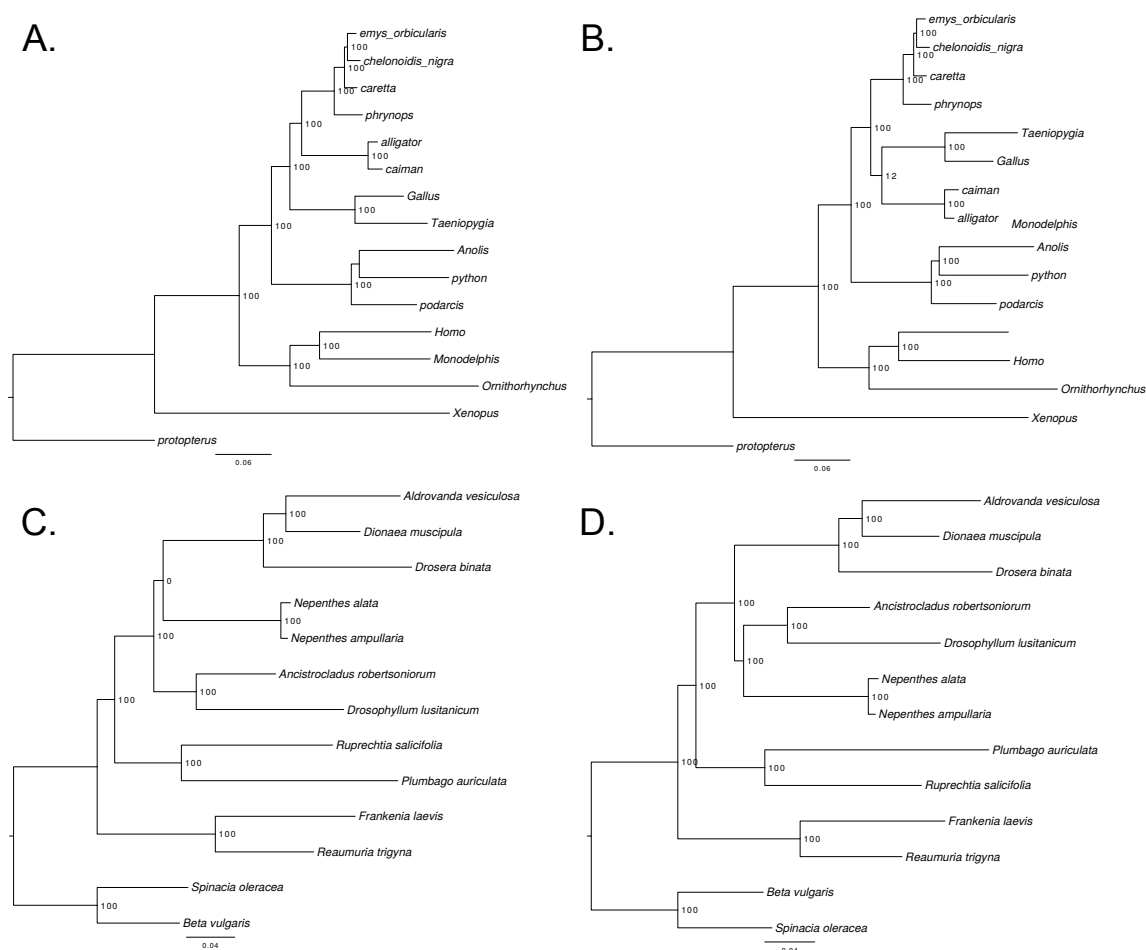

571

572

573

574 **Supplementary Figure 1. Species trees inferred using maximum likelihood from the**

575 **different supermatrices.** Support at each node was obtained from 200 rapid bootstrap

576 replicates. A) Species tree for vertebrate dataset inferred with all 248 genes included in

577 the supermatrix. B) Species tree for the vertebrate dataset inferred with 8916 and 11434

578 removed from the supermatrix. C) carnivorous Caryophyllales species tree inferred from

579 all 1237 genes. D) carnivorous Caryophyllales species tree inferred with cluster575 and  
580 cluster3300 removed from the supermatrix.

581

582

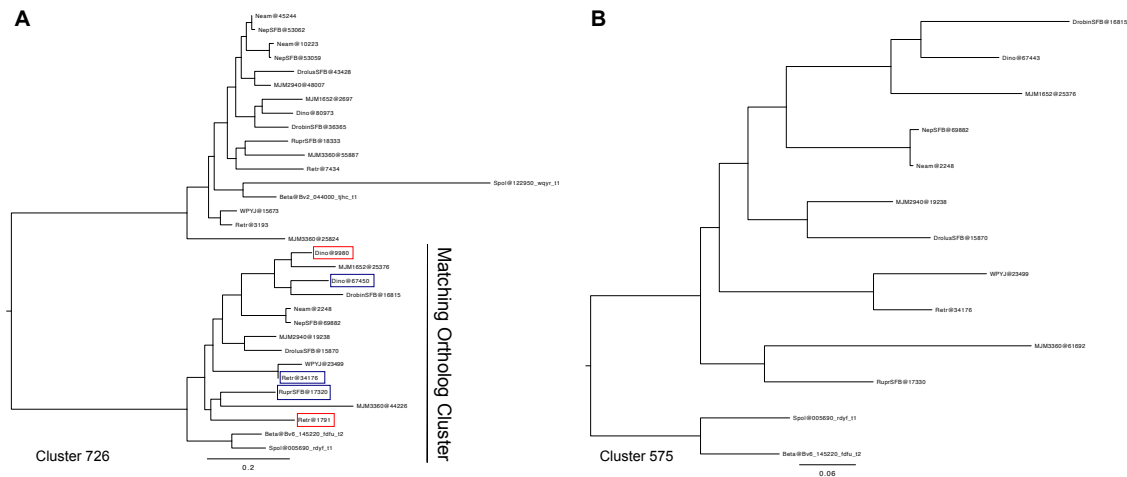

583

584

585

586 **Supplementary Figure 2. Homolog tree for Amino Acid clustered (726) and CDS**  
587 **clustered (575) highly influential gene in the carnivorous Caryophyllales dataset.**

588 Different genes identified in the ortholog clusters are circled on cluster 726. Genes  
589 circled in red represent ones that are shorter and were not identified as orthologous in the  
590 CDS dataset and genes circled in blue represent alternate paralogs or introsplince sites  
591 used between the two clustering analyses.

592

593 **Supplementary Table 1.** Number of gene trees in which all the species for a given edges  
594 are present. edges correspond to node labels on Fig. 1.

| Edge number                                  | Genes containing all species for the edge |
|----------------------------------------------|-------------------------------------------|
| 0                                            | 5                                         |
| 1                                            | 5                                         |
| 2                                            | 246                                       |
| 3                                            | 248                                       |
| 4                                            | 5                                         |
| 5 (All turtle, crocodilians, and birds)      | 6                                         |
| 6                                            | 248                                       |
| 7                                            | 6                                         |
| 8                                            | 23                                        |
| 9                                            | 36                                        |
| 10                                           | 45                                        |
| 11                                           | 69                                        |
| 12                                           | 51                                        |
| 13                                           | 94                                        |
| edge of turtles sister to birds+crocodilians | 36                                        |

595

596

597 **Supplementary Table 2. Sources of discrepancy between the orthologs detected in**  
 598 **highly influential nucleotide cluster575 and in matching amino acid homolog**  
 599 **cluster726.**

| Ortholog in 575                        | Ortholog in 726 | Seq length of 575 (Nuc) | Seq length of 726 (Nuc) | Reason for misidentification                                        |
|----------------------------------------|-----------------|-------------------------|-------------------------|---------------------------------------------------------------------|
| Dino@67443<br>( <i>Dionaea</i> )       | Dino@67450      | 2793                    | 2991                    | Different copy of the in-paralog or intron splice site was retained |
| Dino@67443<br>( <i>Dionaea</i> )       | Dino@9980       | 2793                    | 510                     | Not identified as homologs in blast                                 |
| RuprSFB@17320<br>( <i>Ruprechtia</i> ) | RuprSFB@17330   | 2787                    | 2787                    | Different copy of the in-paralog or intron splice site was retained |
| MJM3360@61692<br>( <i>Plumbago</i> )   | MJM3360@44226   | 2211                    | 2403                    | Different copy of the in-paralog or intron splice site was retained |
| Retr@34176<br>( <i>Reaumuria</i> )     | Retr@1791       | 1044                    | 546                     | Not identified as homologs in blast                                 |

600
